# Supplementary material for: Metal sulfide nanoparticle-based dual barcode-triggered DNAzyme cascade for multiplex miRNA detection in a single assay
Source: Royal Society of Chemistry journal article supplement (doi:10.1039/d2ay01367c), 2022-01-01
Supplement: d2ay01367c1.pdf [file d2ay01367c1.pdf]

**Metal Sulfide Nanoparticle-Based dual bar-Codes triggered  
DNAzyme Cascade for Multiplex miRNA detection in a Single Assay**

**Jiao Wang,<sup>a#</sup> Liyuan Wen,<sup>b#</sup> Ruyuan Cao,<sup>a</sup> Xiaorong Gao,<sup>a</sup> Xia Li,<sup>a</sup> Ensheng Xu,<sup>a</sup>**

**Qi Zhang,<sup>a</sup> Shuling Xu,<sup>a</sup> Caifeng Dai,<sup>c\*</sup> Qingwang Xue,<sup>a\*</sup>**

<sup>a</sup> *School of Chemistry and Chemical Engineering, Liaocheng University, Liaocheng, 252059, Shandong, China*

<sup>b</sup> *Earthquake Monitoring Center station of Liaocheng, Earthquake Administration of Shandong Province*

<sup>c</sup> *Center for Reproductive Medicine, Department of Obstetrics and Gynecology, Qilu Hospital of Shandong University, Ji'nan 250012, Shandong, P.R. China*

<sup>†</sup> *Jiao Wang and Liyuan Wen contributed equally to this work.*

\*Corresponding author:

Tel: +86-635-8239001; Fax: +86-635-8239001

Email: [xueqingwang1983@163.com](mailto:xueqingwang1983@163.com); [daicaifeng1982@163.com](mailto:daicaifeng1982@163.com)

**Tabel S1** Sequence of oligonucleotides

| Name                                          | Sequence(5'-3')                                                                       |
|-----------------------------------------------|---------------------------------------------------------------------------------------|
| hairpin 1<br>(H1)                             | 5'-<br>TCAACATCAGTCTGATAAGCTACCATCTGTTGATAGC<br>TTATCAGACTGATCCAAGACACACGAC-3'-biotin |
| hairpin 2<br>(H2)                             | 5'-<br>CCATCTTTACCAGACAGTGTTACCTAGAGATGTTAAC<br>ACTGTCTGGTAACCATAACTGTCCTG-3'-biotin  |
| hairpin 3<br>(H3)                             | 5'-<br>TAAGCTATCAACAGATGGTAGCTTATCAGACTGATCC<br>ATCTGTTGAGTA-3'-NH <sub>2</sub>       |
| hairpin 4<br>(H4)                             | 5'-<br>GTGTTAACATCTCTAGGTAACACTGTCTGGTAACCTA<br>GAGATGTGAT-3'-NH <sub>2</sub>         |
| miRNA-21                                      | 5'-UAGCUUAUCAGACUGAUGUUGA-3'                                                          |
| miRNA-141                                     | 5'-UAACACUGUCUGGUAAAGAUGG-3'                                                          |
| miRNA-122                                     | 5'-UGGAGUGUGACAAUGGUGUUUG-3'                                                          |
| let-7d                                        | 5'-AGAGGUAGUAGGUUGCAUAGUU-3'                                                          |
| Zn <sup>2+</sup> -specific DNase (Zn-<br>Enz) | 5'-<br>CATCTCTTCTCCGAGCCGGTTCGAAATAGTGAGTAAA<br>AAAAAA-3'                             |
| Zn-Sub<br>(MB1)                               | FAM-5'-<br>CCACCACATTCAAATTCACCAACTATrAGGAAGAGAT<br>GTTACGAGGCGGTGGTGG-3'-BHQ-1       |
| Cu <sup>2+</sup> -specific DNase<br>(Cu-Enz)  | 5'-<br>GGTAAGCCTGGGCCTCTTTCTTTTAAAGAAAGAAGTT<br>-3'                                   |
| Cu-Sub<br>(MB2)                               | Cy3-5'-<br>CACCACCATACTTTTCAACTTCTTTCTTATACGGCTTA<br>CCGCTCGGGGGTGGTG-3'-BHQ-2        |

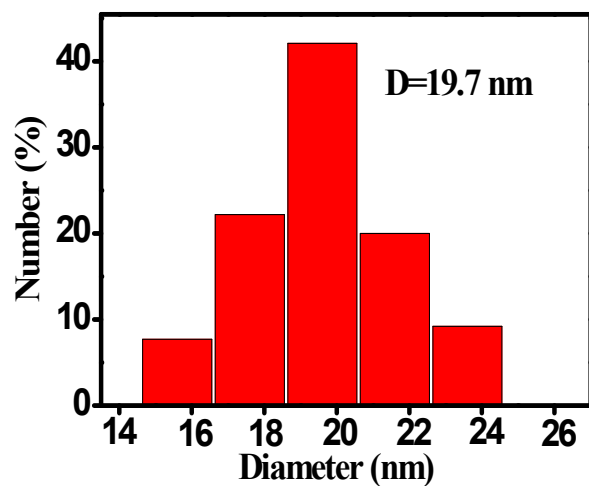

(A)

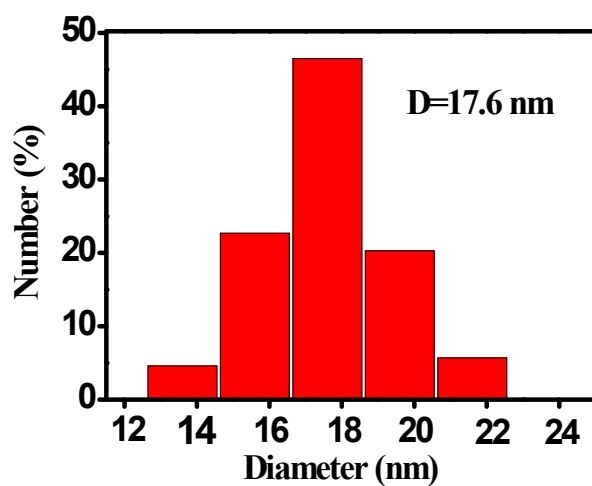

(B)

**Fig. S1** A histogram of size distribution of metal sulfide nanoparticles; **(A)** CuS NPs, **(B)** ZnS NPs (n=50)

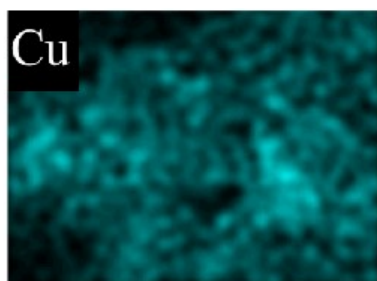

(A)

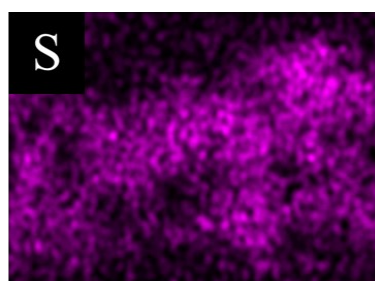

(C)

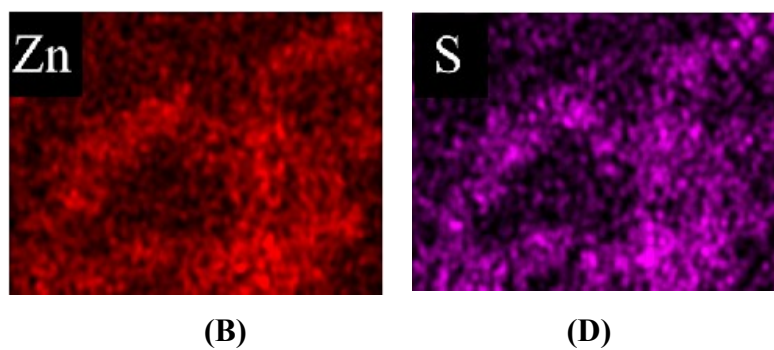

**Fig. S2** the corresponding elemental mapping of (C) Cu, (D) Zn, and (E-F) S for SEM image of CuS and ZnS nanoparticles (Fig. 1), respectively.

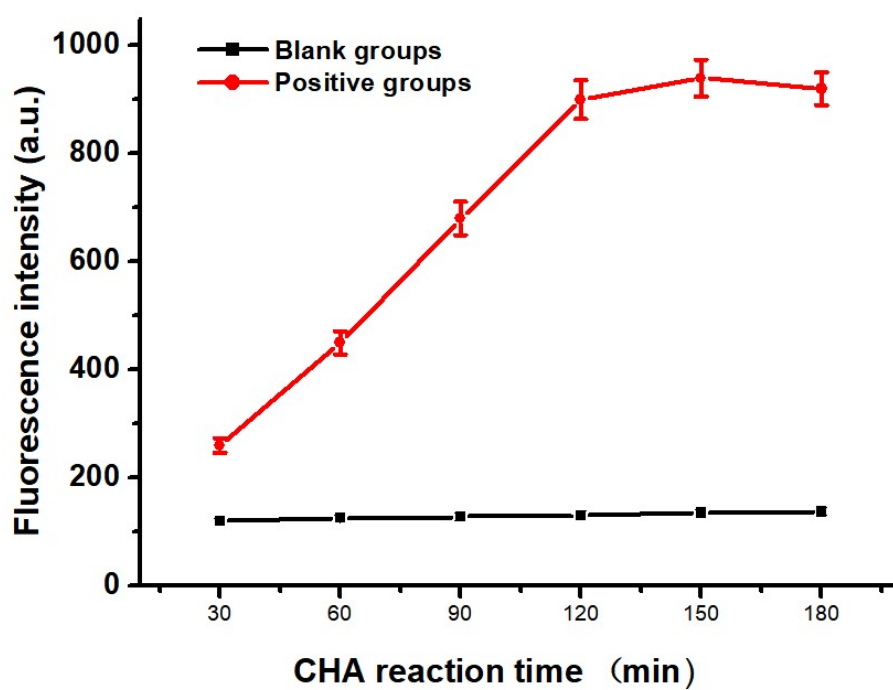

(A)

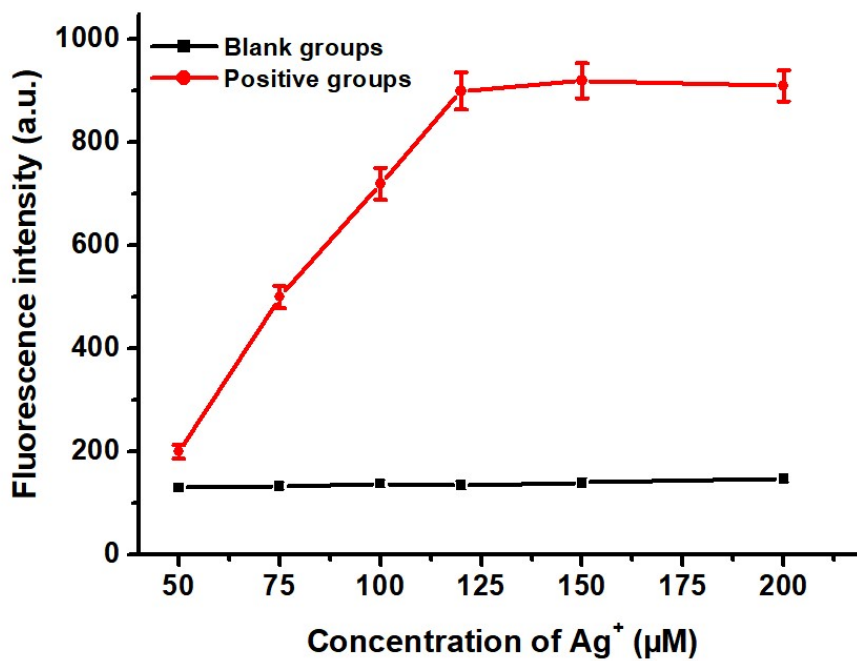

(B)

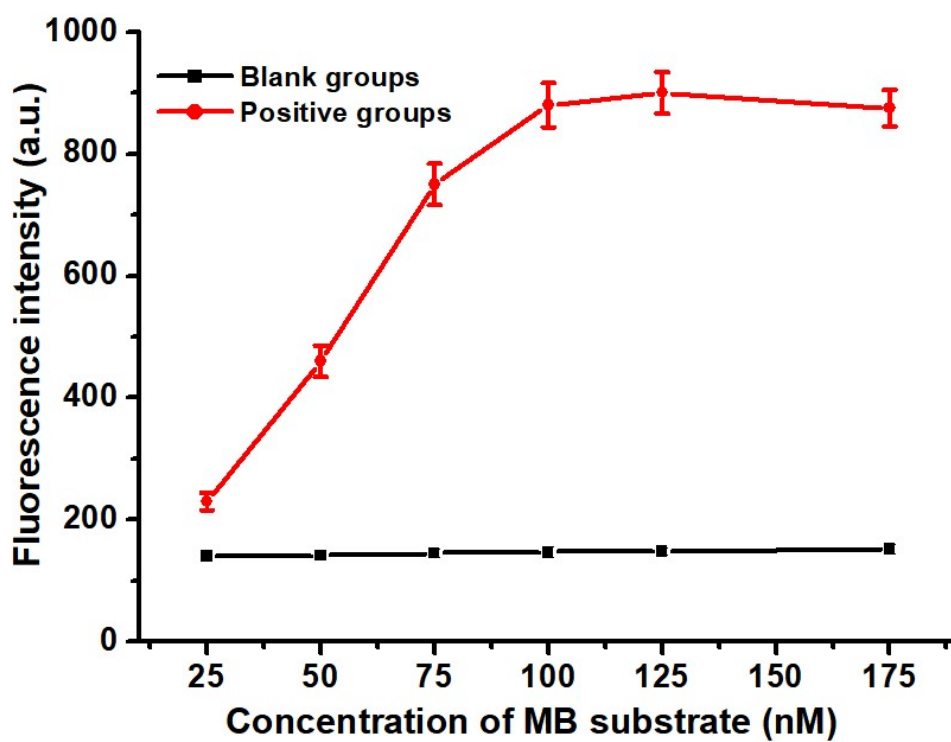

(C)

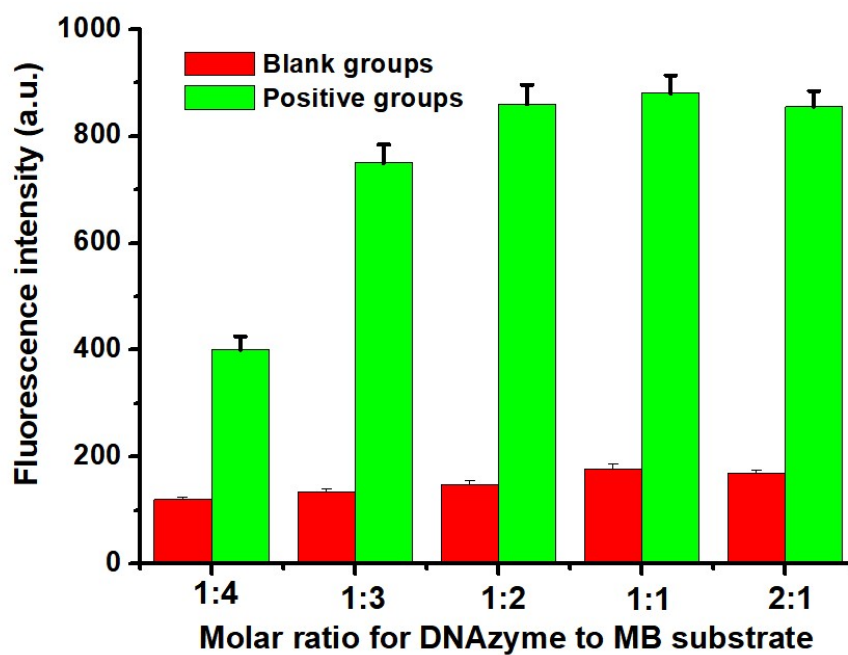

(D)

**Fig. S3** Variance of the fluorescence intensity with (A) the CHA reaction time, (B)  $\text{Ag}^+$  concentration, (C) MB substrate concentration, (D) molar ratio for the DNAzyme to MB substrate in the presence of 30 pM miRNA-141.
